# Supplementary material for: Optimization of Multilayer Films Composed of Chitosan and Low-Methoxy Amidated Pectin as Multifunctional Biomaterials for Drug Delivery
Source: MDPI journal article supplement (doi:10.3390/ijms23158092), 2022-07-22
Supplement: s1 [file s1]

## Supplementary Material

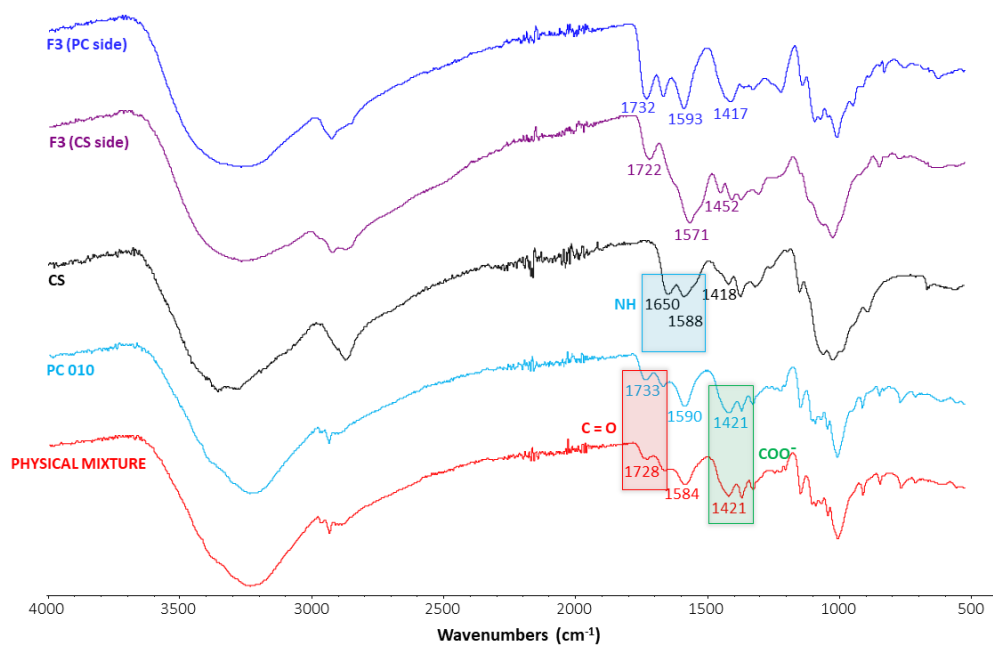

**Figure S1.** Representative FTIR spectra of chitosan (CS), pectin 010 (PC 010), F3, and the corresponding physical mixture (CS:PC 010 1:1).
